# Supplementary material for: Remarkably stable dinuclear, diamagnetic rhenium(VI) salts with the [ReOCl4OReOCl4]2− anion
Source: Royal Society of Chemistry journal article supplement (doi:10.1039/b823327f), 2009-01-01
Supplement: b823327f.pdf [file b823327f.pdf]

Supporting information

**Remarkably stable dinuclear, diamagnetic rhenium(VI) salts with the  $[\text{ReOCl}_4\text{OReOCl}_4]^{2-}$  anion**

Małgorzata Holyńska\*<sup>a</sup> and Tadeusz Lis<sup>a</sup>

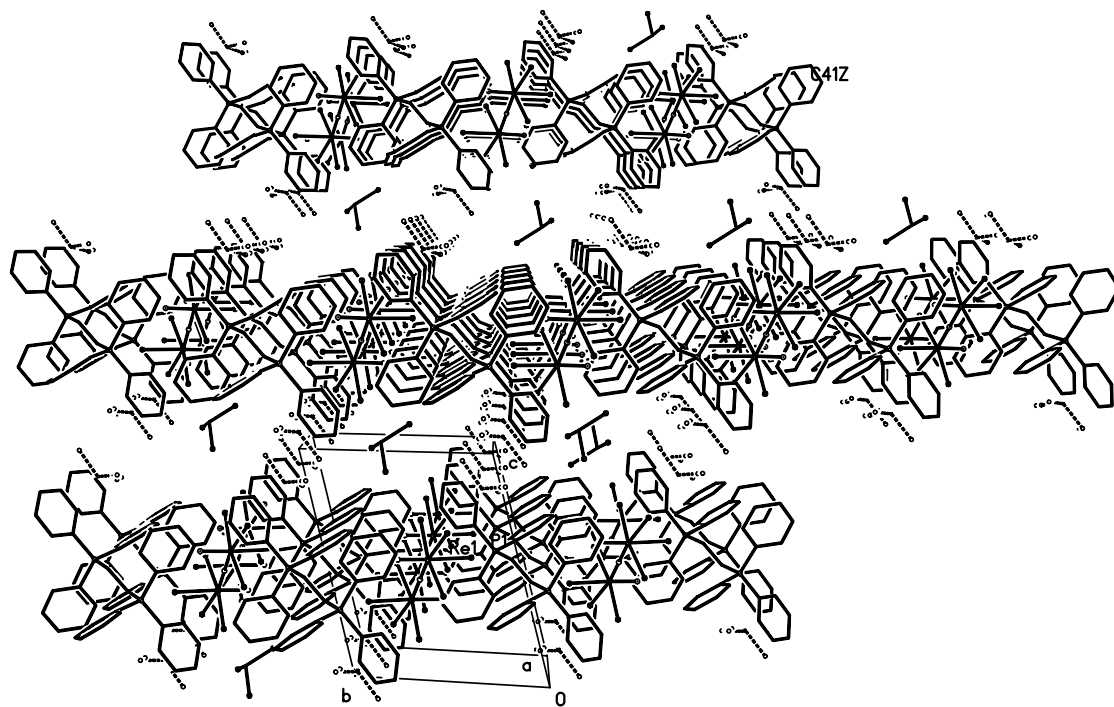

5

**Fig. S1** Crystal structure packing in **A**: cation, anion and chloroform molecules columns along [100] (the disordered chloroform molecule is denoted with dashed lines). H atoms are omitted and the C atoms are shown without thermal ellipsoids for clarity.

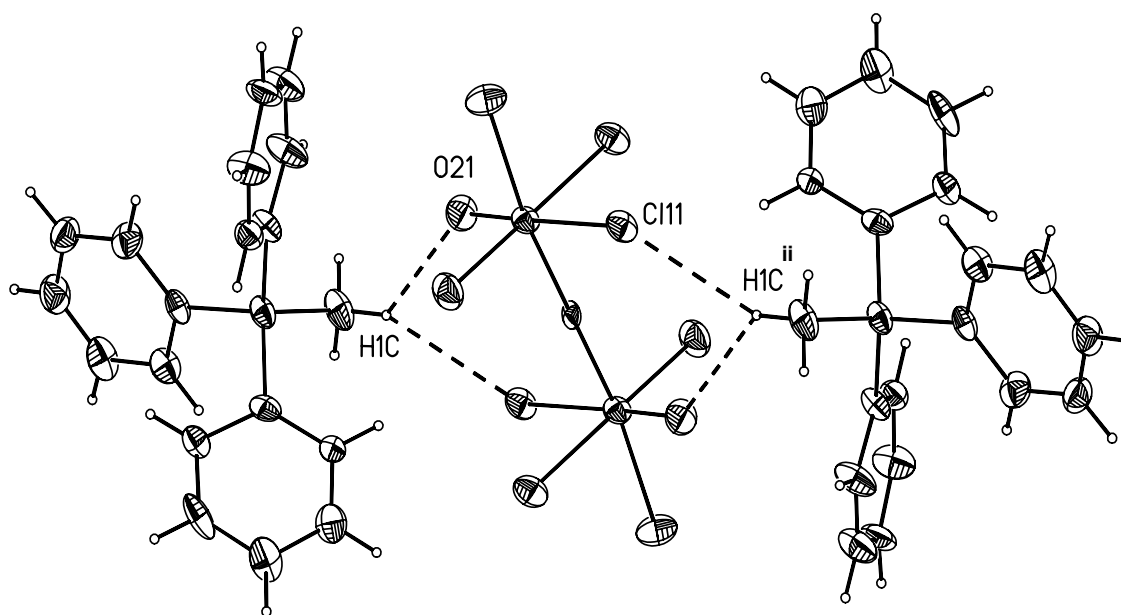

**Fig. S2** The structural motif formed by two cations and one anion in structure **B**. Symmetry code: [ii]  $-x+1, -y+2, -z+1$ . Thermal ellipsoids are drawn at 30% probability level.

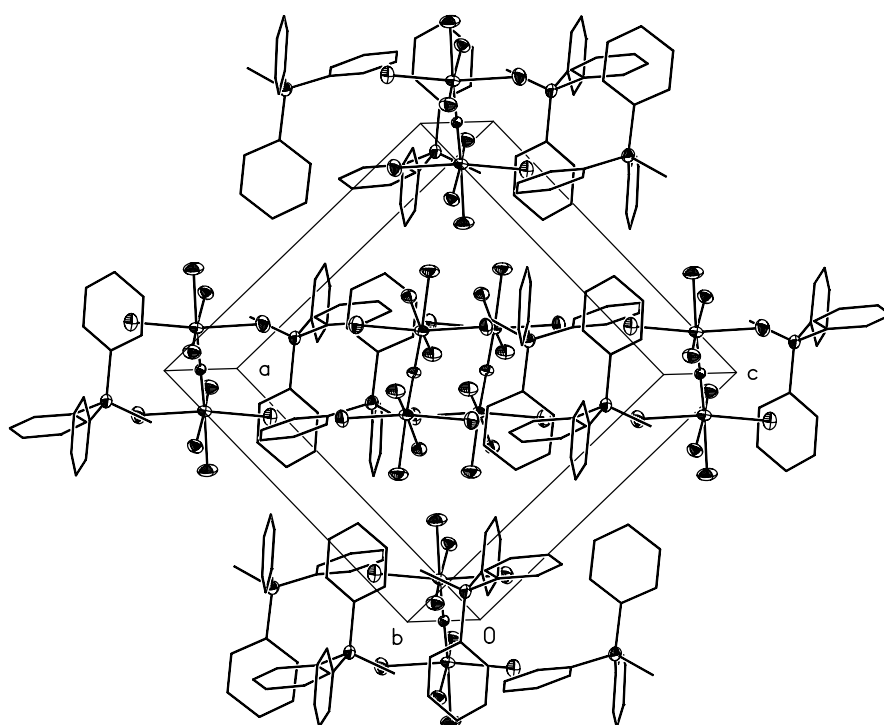

**Fig. S3** Crystal structure packing in **B**: cation and anion columns extending along [010].

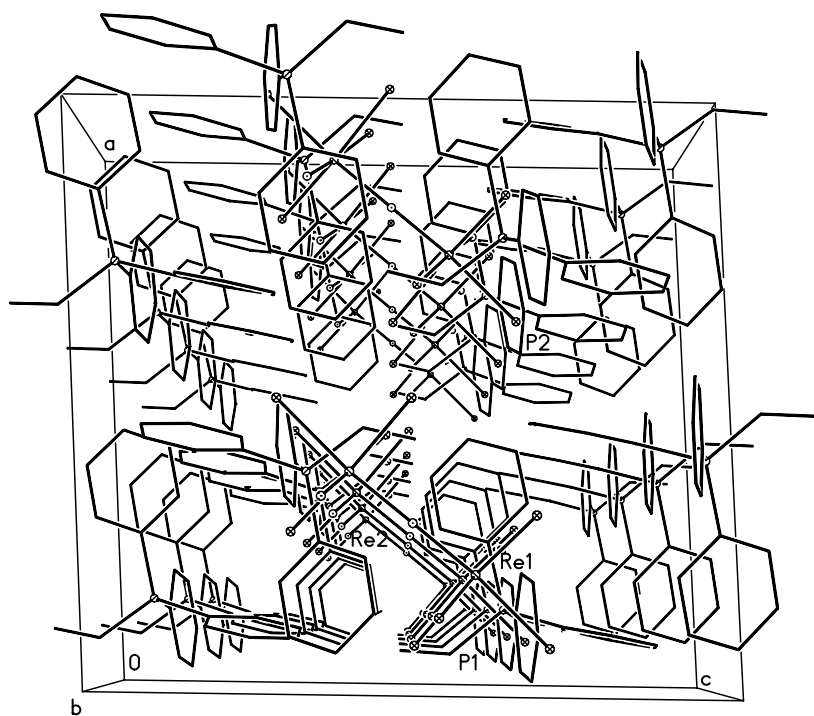

**Fig. S4** Crystal structure packing in **C**: the layered arrangement of cations and anions.

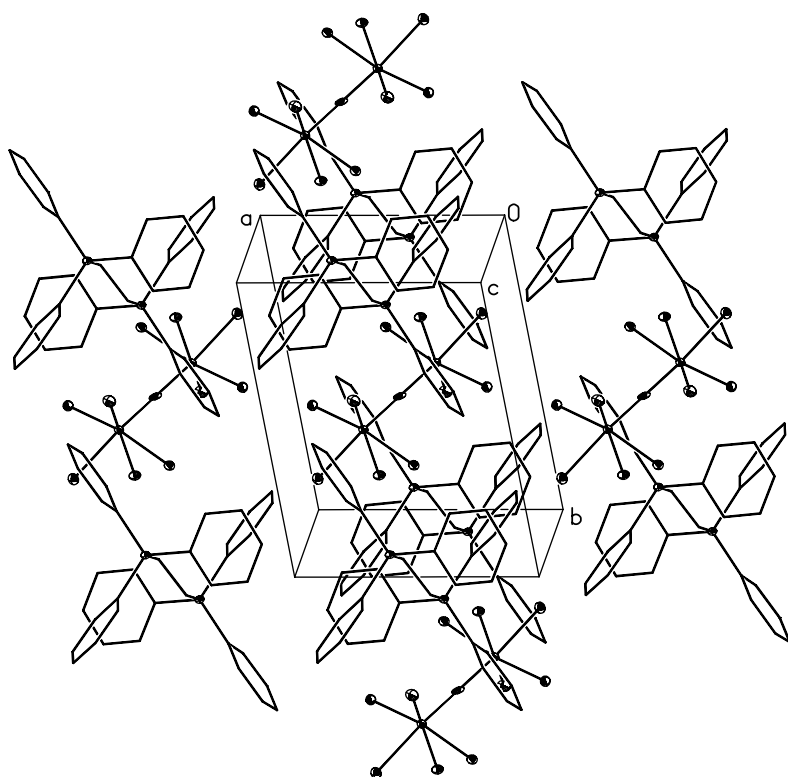

**Fig. S5** Crystal structure packing in **D**: cation layers perpendicular to [010].
